# Supplementary material for: Overexpression of ferroptosis defense enzyme Gpx4 retards motor neuron disease of SOD1G93A mice
Source: PubMed Central journal article supplement (PMC8213805; doi:10.1038/s41598-021-92369-8), 2021-06-18
Supplement: 41598_2021_92369_MOESM1_ESM.pdf [file 41598_2021_92369_MOESM1_ESM.pdf]

*Title:*

**Overexpression of ferroptosis defense enzyme Gpx4 retards motor neuron disease of SOD1G93A mice**

*Authors:* Liuji Chen, Ren Na, Kirsten McLane, Cody Sylvester Thompson, Ju Gao, Xinglong Wang, Qitao Ran

**Supplementary Material**

One supplemental Table and ten supplemental figures are provided to give additional information for the study.

| <b>Case ID</b> | <b>Age (Year)</b> | <b>PMI (hour)</b> | <b>Diagnosis</b> | <b>Gender</b> |
|----------------|-------------------|-------------------|------------------|---------------|
| A1             | 40                | 15.6              | ALS              | M             |
| A2             | 54                | 29.1              | ALS              | M             |
| A3             | 59                | 20.3              | ALS              | F             |
| A4             | 61                | 7.5               | ALS              | F             |
| A5             | 70                | 18.9              | ALS              | M             |
| A6             | 76                | 8.6               | ALS              | F             |
| A7             | 81                | 4                 | ALS              | F             |
| A8             | 81                | 17.2              | ALS              | M             |
| A9             | 82                | 20.5              | ALS              | M             |
| A10            | 82                | 12.1              | ALS              | F             |
| C1             | 41                | 13                | control          | M             |
| C2             | 41                | 20                | control          | M             |
| C3             | 41                | 14                | control          | M             |
| C4             | 42                | 27                | control          | F             |
| C5             | 45                | 19                | control          | M             |
| C6             | 49                | 26                | control          | F             |
| C7             | 50                | 15                | control          | F             |
| C8             | 50                | 24                | control          | M             |
| C9             | 65                | 25                | control          | M             |
| C10            | 74                | 18                | control          | M             |

**Supplemental Table 1.** Information of human lumbar spinal cord tissues used in this study.

**s1A**

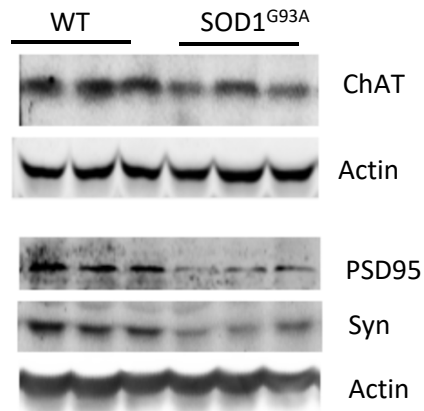

**s1B**

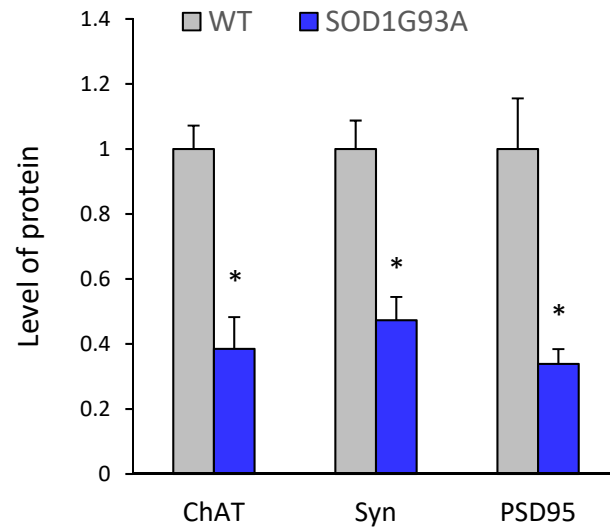

**Supplemental Fig. 1. Loss of neuronal proteins in advanced symptomatic stage in**

**SOD1<sup>G93A</sup> mice. s1A.** Graph of western blots showing levels of neuronal marker proteins

in lumbar spinal cord tissues of WT and SOD1<sup>G93A</sup> mice at 150 days of age. Syn:

synaptophysin. **s1B.** Quantified results of western blots. n = 3. \*:  $p < 0.05$ .

**s2A**

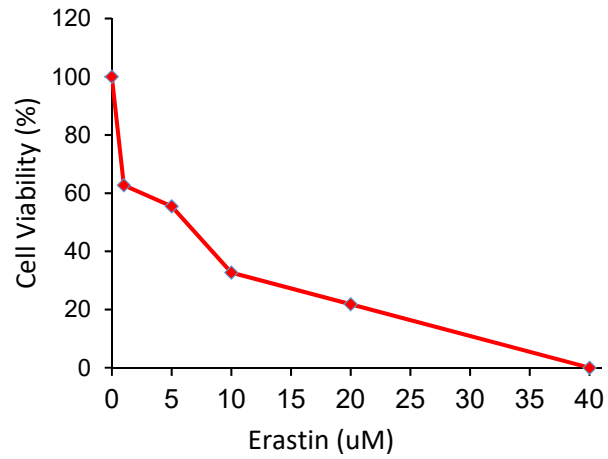

**s2B**

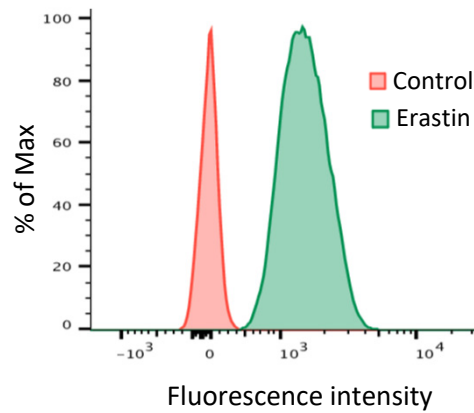

**Supplemental Fig. 2. Erastin treatment induced cell death in NSC-34 cells as well as increased lipid ROS. s2A.** Viabilities of NSC-34 cells exposed to Erastin. **s2B.** Graph of flow cytometry analysis showing oxidation of BODIPY581/591 C11 in NSC-34 cells exposed to 10  $\mu\text{M}$  Erastin

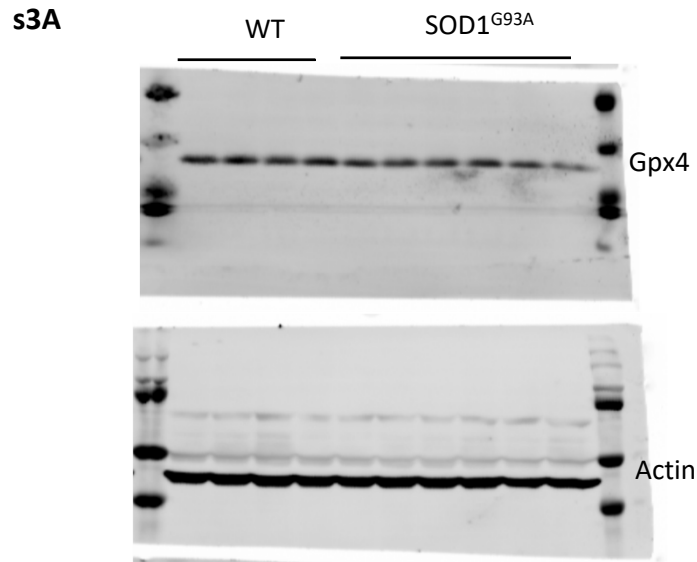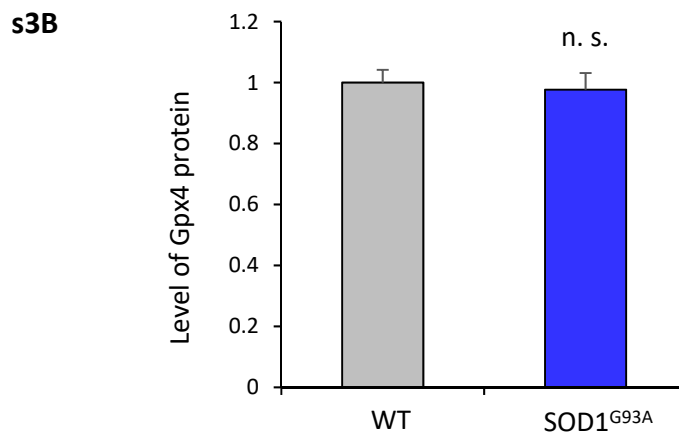

**Supplemental Fig. 3. Level of Gpx4 protein in the spinal cords of asymptomatic SOD1<sup>G93A</sup> mice. s3A.** Graph of western blots showing levels of Gpx4 proteins in lumbar spinal cord tissues of WT and asymptomatic SOD1<sup>G93A</sup> mice (60 days of age). **s3B.** Quantified results of western blots. n. s.: not statistically significant

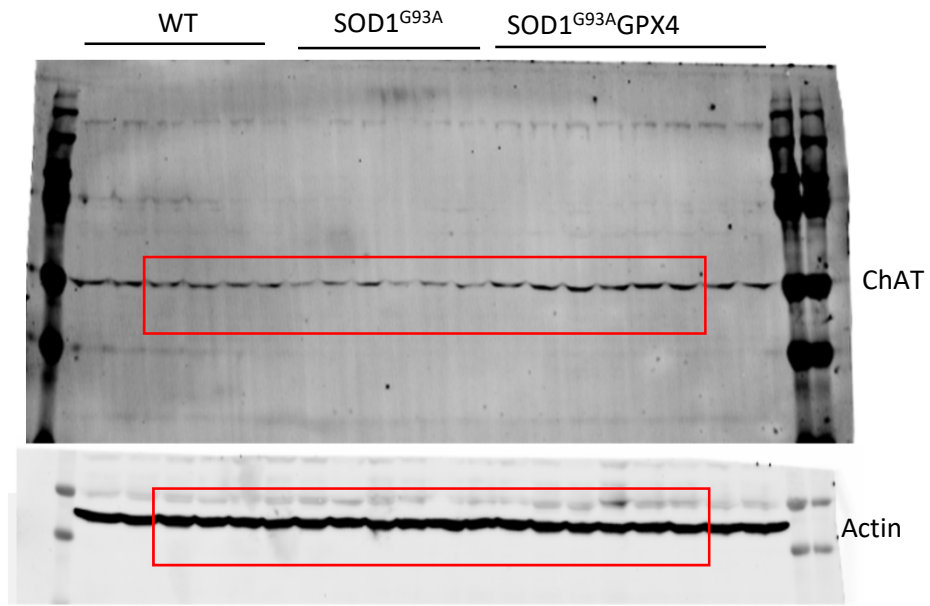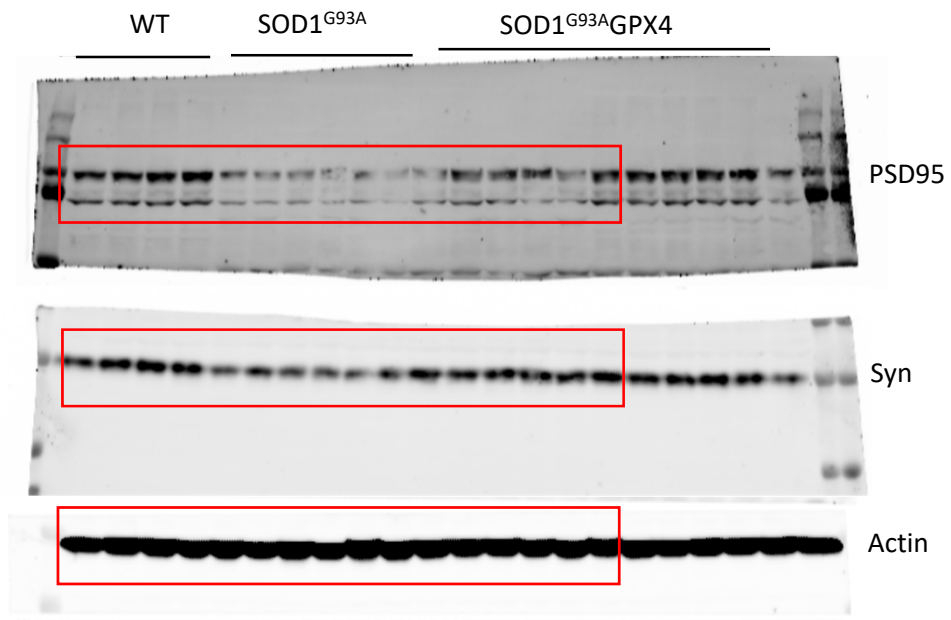

**Supplemental Fig. 4.** Full western blots of Fig 4A. Red boxes indicate regions of blots used.

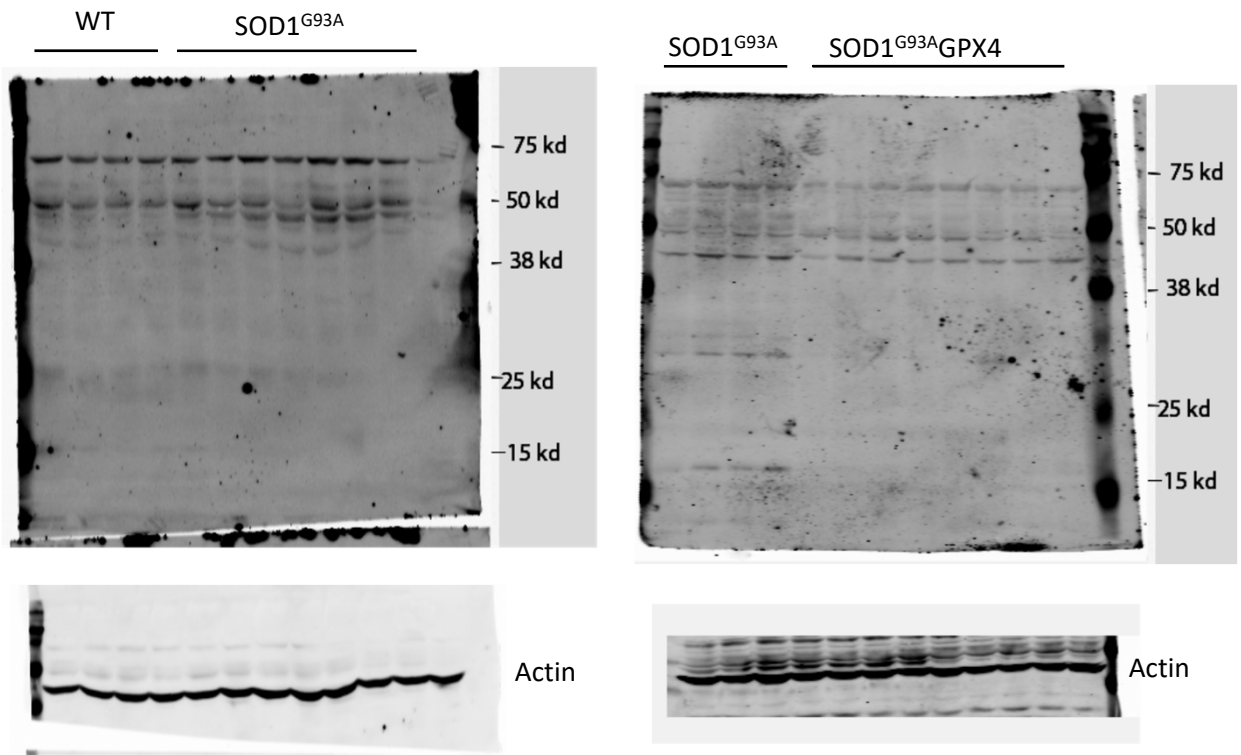

**Supplemental Fig. 5.** 4HNE blots for Fig. 4D

s6A

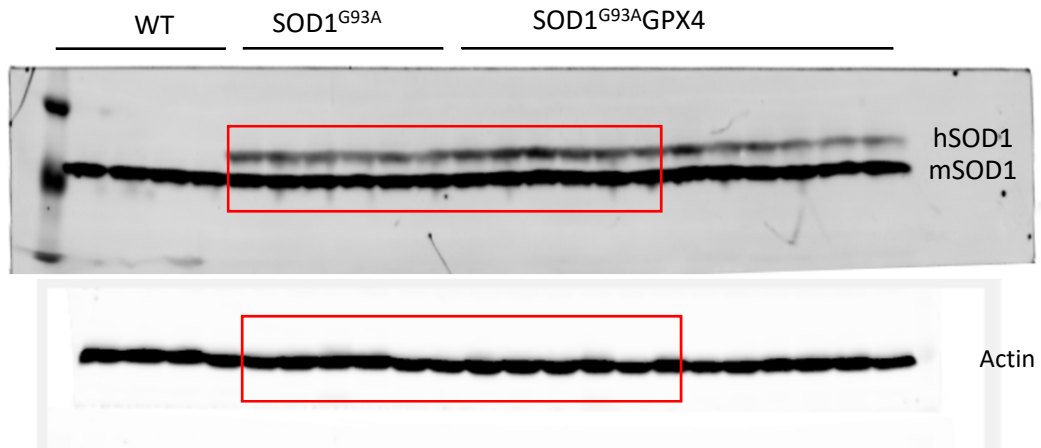

s6B

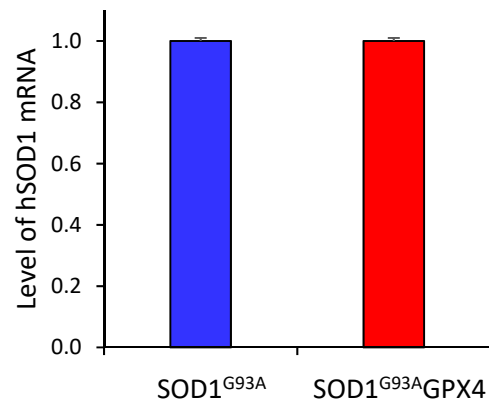

**Supplemental Fig. 6. A.** Full western blots of Fig 4E. Red boxes indicate regions of blots used. **B.** Levels of hSOD1 mRNA quantified by qRT-PCR. n = 4.



**s7A**

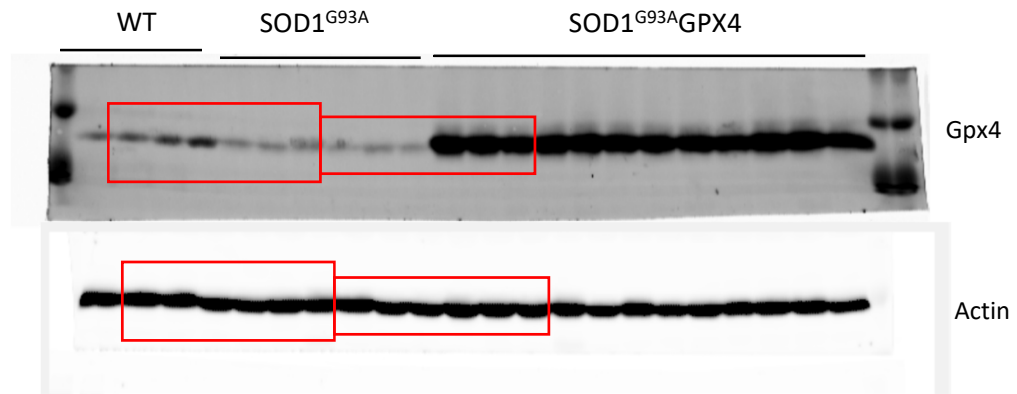

**s7B**

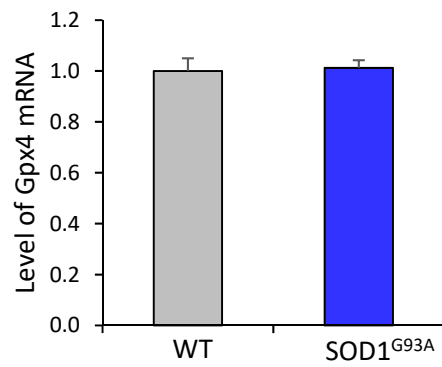

**Supplemental Fig. 7. s7 A.** Western blots showing levels of Gpx4 protein in spinal tissues of WT, symptomatic SOD1<sup>G93A</sup> mice and SOD1<sup>G93A</sup>GPX4 mice (120 days of age). Small and big red boxes indicate regions of blots used in Fig. 1B and Fig. 6A, respectively. **s7B.** Levels of Gpx4 mRNA quantified by Real-Time qRT-PCR.

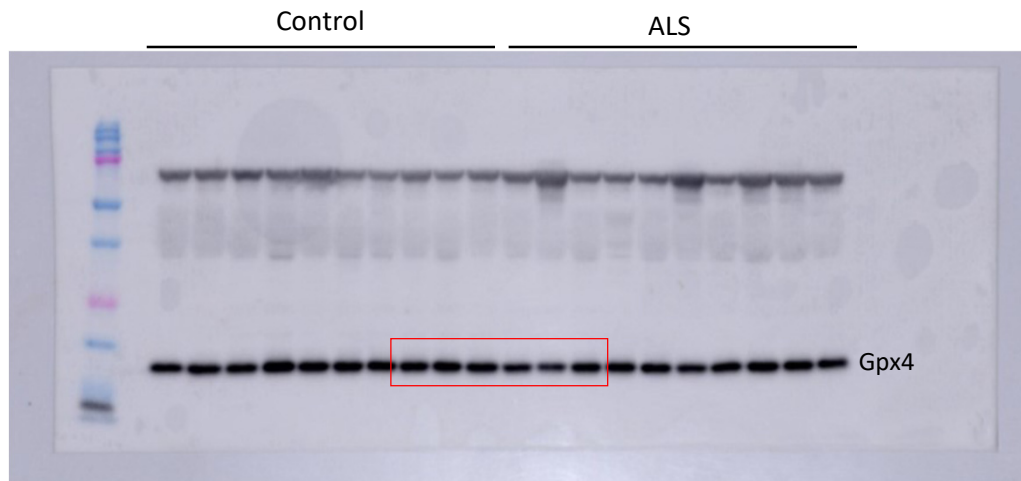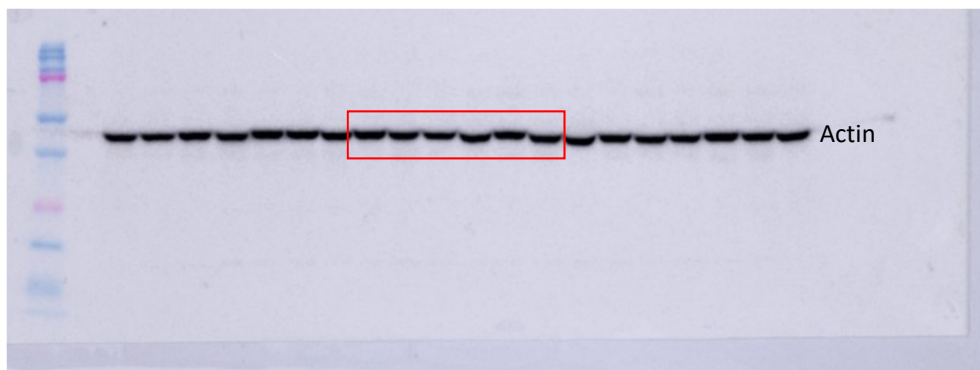

**Supplemental Fig. 8.** Western blots showing levels of Gpx4 protein in spinal tissues from ALS cases and Control (non-ALS) cases. Red boxes indicate regions of blots used in Fig. 6F.

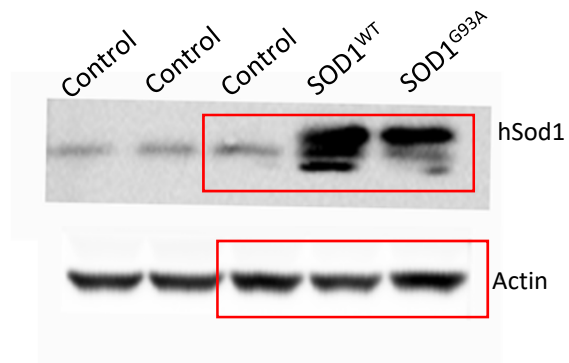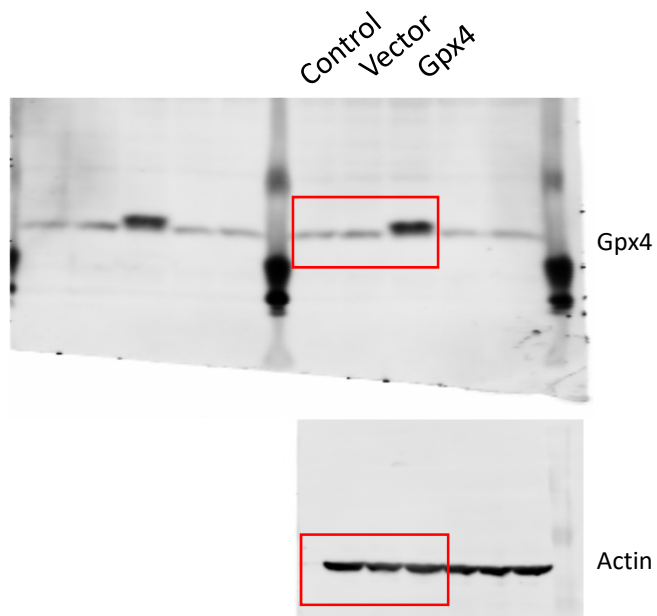

**Supplemental Fig. 9.** Western blots of Fig. 5A and Fig. 5B. Red boxes indicate regions of blots used.

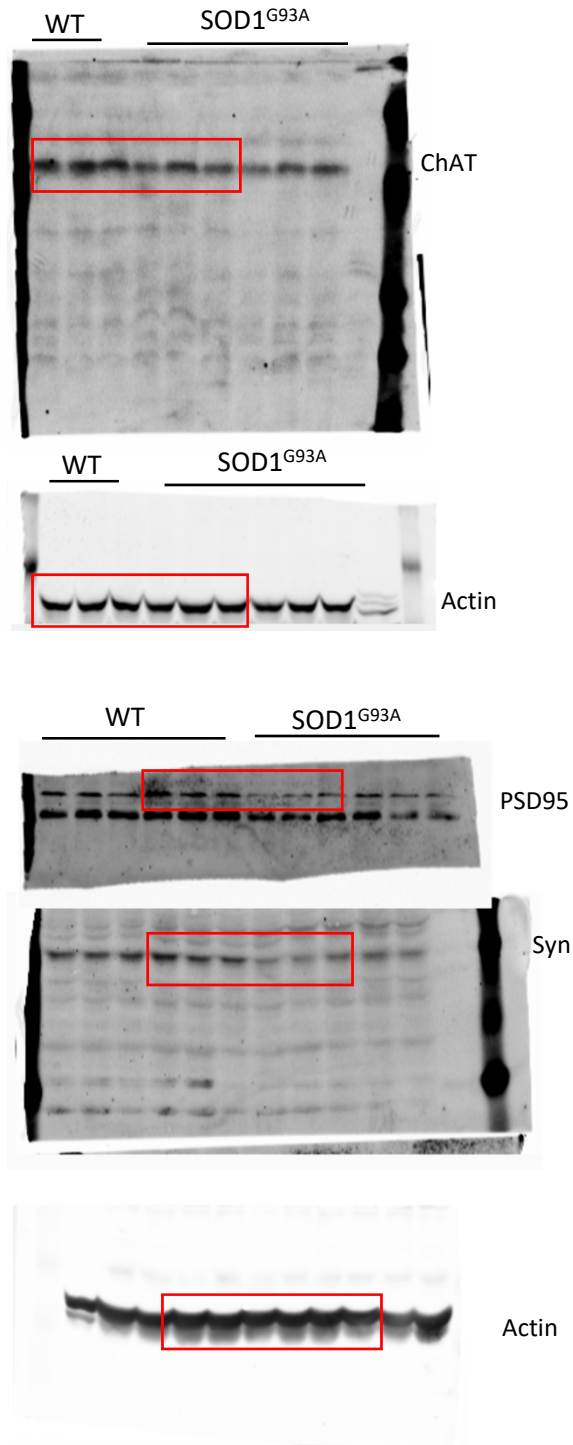

**Supplemental Fig. 10.** Western blots of Supplemental Fig. 1A. Red boxes indicate regions of blots used.
